# Supplementary material
Source: MDPI journal article supplement (https://www.mdpi.com/2073-4344/9/6/557)
Supplement: s1 [file s1]

# **The Impact of CeO<sub>2</sub> Loading on the Activity and Stability of PdO/ $\gamma$ -AlOOH/ $\gamma$ -Al<sub>2</sub>O<sub>3</sub> Monolith Catalysts for CH<sub>4</sub> Oxidation**

Hamad Almohamadi and Kevin J. Smith\*

Department of Chemical and Biological Engineering, University of British Columbia, 2360 East  
Mall, Vancouver, British Columbia V6T 1Z3, Canada

\* email: [kjs@mail.ubc.ca](mailto:kjs@mail.ubc.ca)

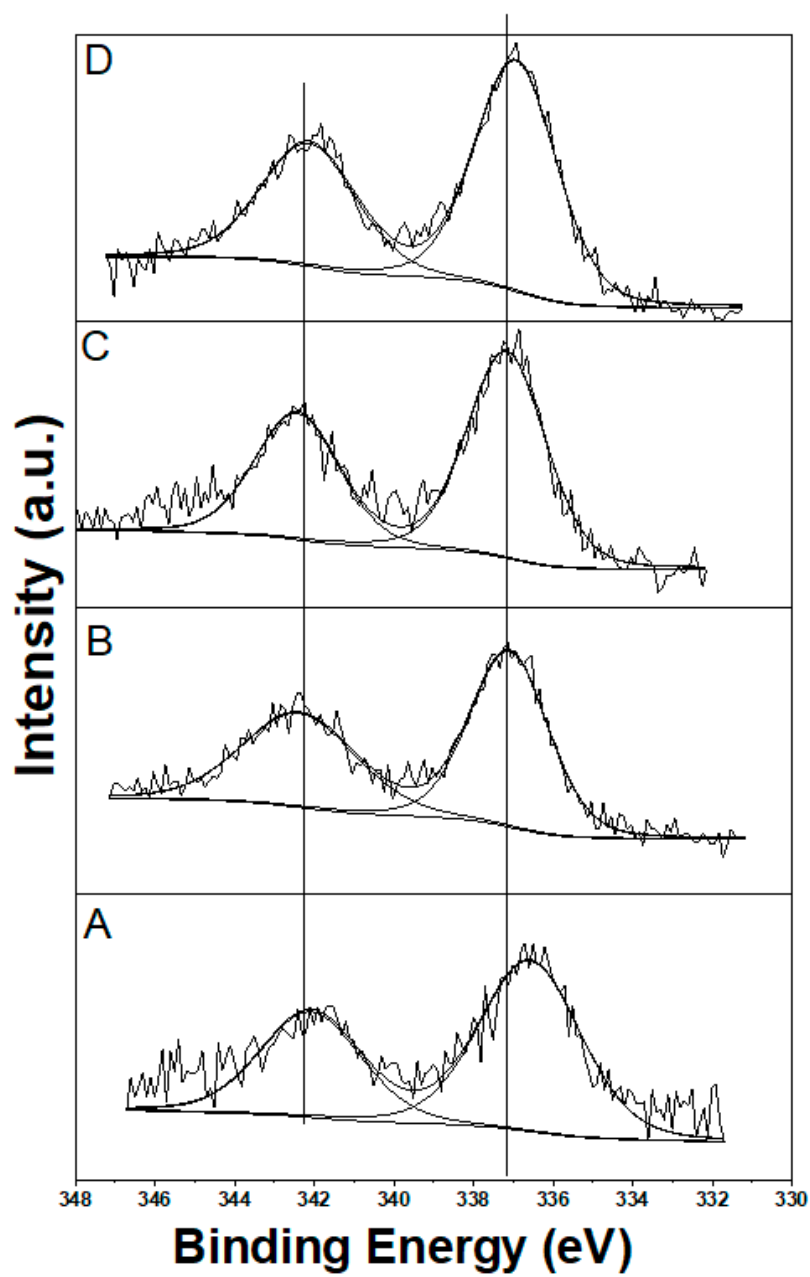

**Figure S1:** XPS Pd 3d spectra measured for catalysts: A – Pd0Ce; B- Pd1Ce; C: Pd2Ce; D: Pd4Ce.

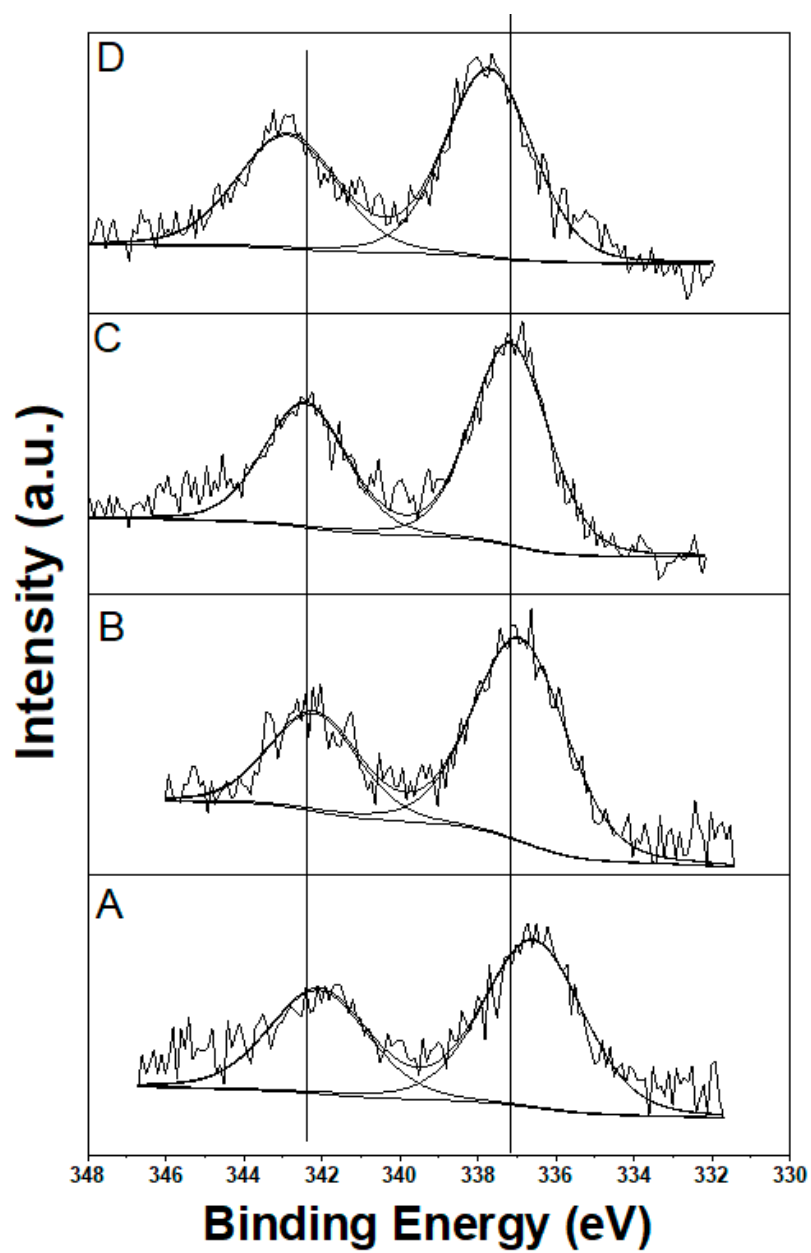

**Figure S2** : XPS Pd 3d spectra measured for catalysts: A - Pd0Ce; B - Pd0Ce-used; C - Pd2Ce; D - Pd2Ce-used.

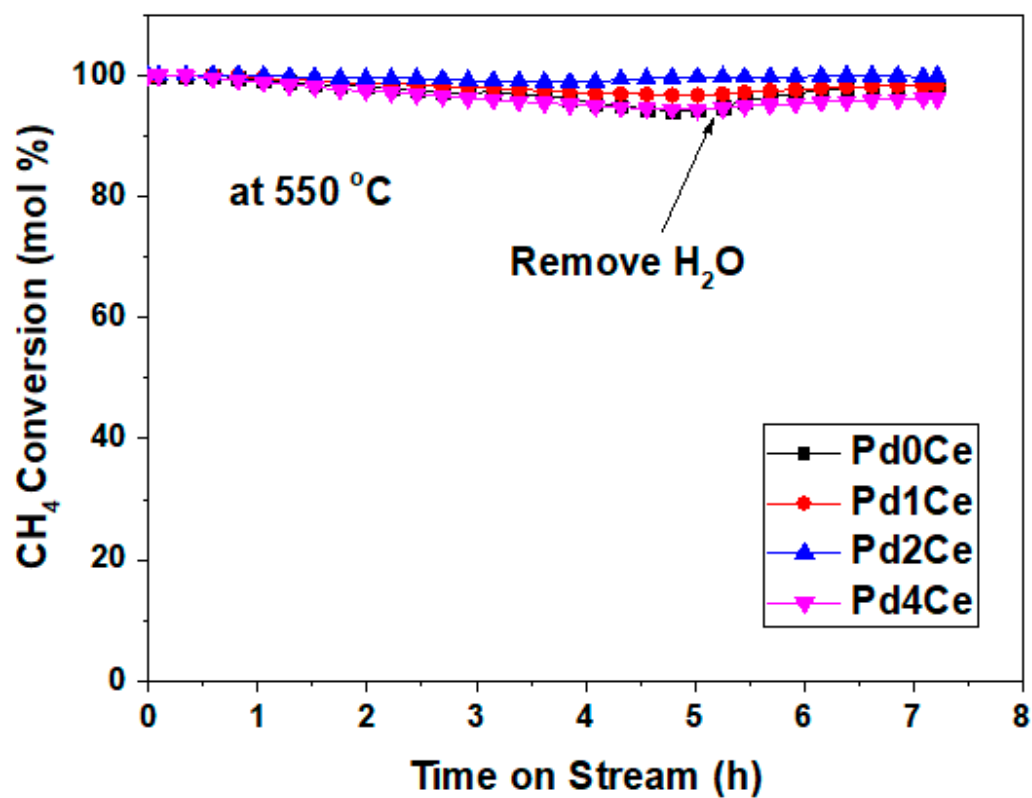

**Figure S3:** TOS results after adding 10 vol % H<sub>2</sub>O to the dry feed gas. Reaction conditions:

Total feed gas flow = 1025 cm<sup>3</sup>(STP)·min<sup>-1</sup>, GHSV = 36000 h<sup>-1</sup>, Feed gas composition: 0.07 vol % CH<sub>4</sub>, 8.5 vol % O<sub>2</sub>, 0.06 vol % CO, 8 vol% CO<sub>2</sub> and 10 vol % H<sub>2</sub>O in N<sub>2</sub> and He at 550 °C.

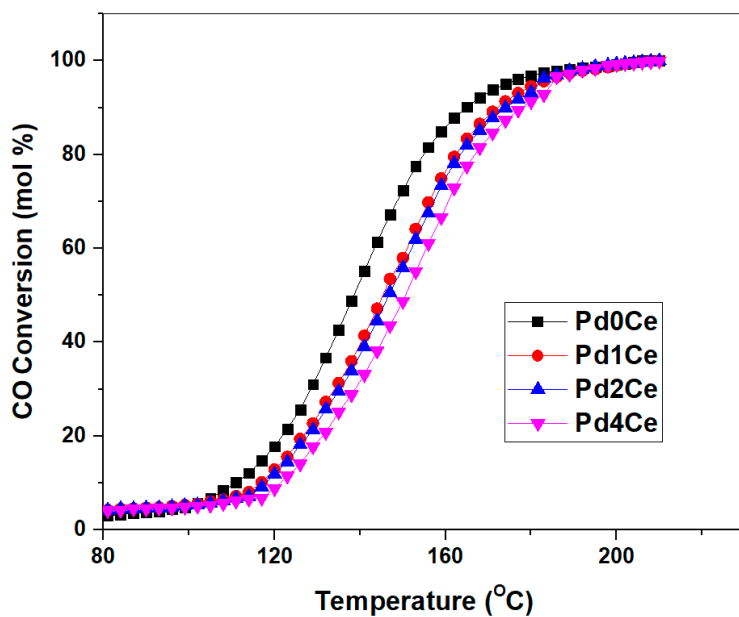

**Figure S4:** Temperature-programmed oxidation profile for CO conversion as function of temperature for the catalysts. Reaction conditions: Total feed gas flow =  $1025 \text{ cm}^3(\text{STP}) \cdot \text{min}^{-1}$ , GHSV of  $36000 \text{ h}^{-1}$ , Feed gas composition: 0.07 vol %  $\text{CH}_4$ , 8.5 vol %  $\text{O}_2$ , 0.06 vol% CO, and 8 vol %  $\text{CO}_2$  in  $\text{N}_2$  and He.

### Heat and Mass transfer effects:

The maximum temperature inside the washcoat is calculated using equation S1 to make sure the assumption of the isothermal condition is valid.

$$T_{max} = T_s - \frac{\Delta H_r D_{eff} C_{CH_4}}{k_p} \quad S1$$

Table S1 Calculation of the maximum temperature inside the washcoat

| Parameter    | Definition                                                                              | Value      |
|--------------|-----------------------------------------------------------------------------------------|------------|
| $T_s$        | Surface temperature (K)                                                                 | 523        |
| $\Delta H_r$ | Heat of reaction at 298 K, (kJ mol <sup>-1</sup> )                                      | -891       |
| $D_{eff}$    | Effective diffusivity, (m <sup>2</sup> s <sup>-1</sup> )                                | 1.67E-07   |
| $C_{CH_4}$   | CH <sub>4</sub> concentration, (mol m <sup>-3</sup> )                                   | 0.029      |
| $k_p$        | Thermal conductivity of washcoat, (kJ m <sup>-1</sup> s <sup>-1</sup> K <sup>-1</sup> ) | 0.025      |
| $T_{max}$    | Reaction temperature (K)                                                                | 523+1.7e-4 |

From the results  $T_{max}$  is equal to  $T_s$ ; thus, the temperature gradient in the washcoat layer will be small due to the low CH<sub>4</sub> concentration and the thin layer of washcoat.

External Mass Transfer Calculation:

$$Open\ Frontal\ Area\ (OFA) = \frac{(l - t_w)^2}{l^2} \quad S2$$

$$Geometric\ Surface\ Area\ (GSA) = \frac{4(l - t_w)}{l^2} \quad S3$$

where  $l$  = width of channel in inches and  $t_w$  = thickness of the wall in inches

$$Hydraulic\ diameter\ (d_h) = \frac{4\ OFA}{GSA} \quad S4$$

Washcoat Reynolds number is calculated as follows:

$$Re = \frac{d_h u \rho_g}{\mu} \quad S5$$

Where  $L_c$  is the washcoat thickness,  $\mu$  is the dynamic gas viscosity, and  $\epsilon_d$  is the washcoat porosity,  $\rho_g$  the gas density and  $u_s$  the superficial gas velocity are defined as:

$$\rho_g = \frac{PM_{wfeed}}{RT} \quad S6$$

$$u = \frac{v_0}{A} \quad S7$$

Schmidt number is given by:

$$Sc = \frac{\mu}{\rho_g D_{CH_4, He}} \quad S8$$

In a gas phase system with  $Re < 2000$  and  $0.4 < \epsilon_d < 0.79$ ,  $j_D$  factor is calculated

$$j_D \epsilon_d = 0.35 Re^{-0.359} \quad S9$$

The Sherwood number is calculated as follows

$$Sh = j_D Re Sc^{\frac{1}{3}} \quad S10$$

The external mass transfer coefficient ( $k_c$ ) is calculated as follows:

$$k_c = \frac{D_{CH_4, He} Sh}{L_c} \quad S11$$

Mears criterion is calculated as follows

$$C_M = \frac{r_{CH_4}^m \rho_{wash} L_c}{k_c C_{CH_4}} \quad S12$$

The mass transfer from the bulk gas phase to the surface of the washcoat is negligible if  $C_M$  is  $< 0.15$ .  $C_M$  is obtained as 0.0002 in this study which indicates the absence of external heat transfer limitations since  $C_M$  is  $< 0.15$

Table Error! No text of specified style in document.1 Details of calculations for Mears criterion factor for Pd0Ce at 523 K

| Parameter         | Definition                                                                          | Value    |
|-------------------|-------------------------------------------------------------------------------------|----------|
| T                 | Reaction temperature (K)                                                            | 523      |
| P                 | Total pressure (Pa)                                                                 | 101325   |
| R                 | Gas constant (Pa.m <sup>3</sup> .mol <sup>-1</sup> .K <sup>-1</sup> )               | 8.314    |
| $M_{wfeed}$       | Feed molecular weight (kg.kmol <sup>-1</sup> )                                      | 34       |
| $F_{CH_4}^o$      | Feed CH <sub>4</sub> molar flow (mol.s <sup>-1</sup> (STP))                         | 5.35e-7  |
| OFA               | Open frontal area (m <sup>2</sup> / m <sup>2</sup> )                                | 0.75     |
| GSA               | Geometric surface area (m/ m <sup>2</sup> )                                         | 3.04     |
| d <sub>h</sub>    | Hydraulic diameter (m)                                                              | 0.98     |
| r <sub>t</sub>    | Radius of reactor (m)                                                               | 4.6e-3   |
| A <sub>c</sub>    | Cross sectional area of the reactor (m <sup>2</sup> )                               | 6.4e-5   |
| u <sub>s</sub>    | Superficial gas velocity (m.s <sup>-1</sup> )                                       | 0.26     |
| ε <sub>b</sub>    | Washcoat porosity                                                                   | 0.67     |
| $D_{CH_4,He}$     | Binary bulk diffusivity, (m <sup>2</sup> s <sup>-1</sup> )                          | 1.04e-04 |
| ρ <sub>g</sub>    | Gas density (kg.m <sup>3</sup> )                                                    | 0.78     |
| μ                 | Gas dynamic viscosity (kg.m <sup>-1</sup> .s <sup>-1</sup> )                        | 3.87e-5  |
| Re                | Reynolds Number                                                                     | 5.13     |
| Sc                | Schmidt Number                                                                      | 0.5      |
| j <sub>D</sub>    | j <sub>D</sub> factor                                                               | 0.29     |
| S <sub>h</sub>    | Sherwood number                                                                     | 1.15     |
| k <sub>c</sub>    | External mass transfer coefficient, (m s <sup>-1</sup> )                            | 3.43     |
| $C_{CH_4}$        | CH <sub>4</sub> concentration, (mol m <sup>-3</sup> )                               | 0.029    |
| $-r_{CH_4}^m$     | CH <sub>4</sub> oxidation reaction rate (mol.kgcat <sup>-1</sup> .s <sup>-1</sup> ) | 3.06E-04 |
| ρ <sub>wash</sub> | Washcoat density (kg.m <sup>3</sup> )                                               | 1340     |
| C <sub>M</sub>    | Mears criterion factor                                                              | 0.0002   |
